# Supplementary material for: Stable Fe(ii)-based coordination polymers: synthesis, structural diversity and catalytic applications in homo-coupling reactions
Source: Royal Society of Chemistry journal article supplement (doi:10.1039/c8dt01839a), 2018-01-01
Supplement: c8dt01839a1.pdf [file c8dt01839a1.pdf]

## Supporting Information

### Stable Fe(II)-Based Coordination Polymers: Synthesis, Structural Diversity and Catalytic Applications in Homo-coupling Reactions

Qiong Wu,<sup>‡a</sup> Yanbing Han,<sup>‡a</sup> Zhichao Shao,<sup>a</sup> Junxia Li,<sup>b</sup> and Hongwei Hou <sup>\*a</sup>

<sup>a</sup>The College of Chemistry and Molecular Engineering, Zhengzhou University, Zhengzhou, Henan, 450001, P. R. China

<sup>b</sup>Food and Drug Inspection Institute of Zhengzhou, Henan 450000, P. R. China

\*Author for correspondence:

Prof. Hongwei Hou, E-mail: houghongw@zzu.edu.cn.

#### Contents

|                                                                                |          |
|--------------------------------------------------------------------------------|----------|
| 1. Crystallographic data and structure refinement details for <b>1-3</b> ..... | Table S1 |
| 2. Bond lengths and angles of <b>1-3</b> .....                                 | Table S2 |
| 3. PXRD patterns of <b>1-3</b> .....                                           | Fig S1   |
| 4. TGA curve of <b>1-3</b> .....                                               | Fig S2   |
| 5. PXRD pattern of <b>1</b> before and after the catalyst reaction.....        | Fig S3   |
| 6. <sup>1</sup> H NMR data of Biphenyl compounds.....                          | Table S3 |

**Table S1** Crystallographic data and structure refinement details for polymers **1–3**<sup>a,b</sup>

| Complex                                    | <b>1</b>                                                                                      | <b>2</b>                                                                                      | <b>3</b>                                                                                        |
|--------------------------------------------|-----------------------------------------------------------------------------------------------|-----------------------------------------------------------------------------------------------|-------------------------------------------------------------------------------------------------|
| formula                                    | C <sub>79</sub> H <sub>95</sub> N <sub>41</sub> O <sub>4</sub> S <sub>5</sub> Fe <sub>3</sub> | C <sub>78</sub> H <sub>90</sub> N <sub>42</sub> O <sub>3</sub> S <sub>6</sub> Fe <sub>3</sub> | C <sub>36</sub> H <sub>64</sub> N <sub>18</sub> O <sub>11</sub> Cl <sub>6</sub> Fe <sub>3</sub> |
| f <sub>w</sub>                             | 2009.54                                                                                       | 2024.01                                                                                       | 1305.43                                                                                         |
| T/K                                        | 293(2)                                                                                        | 293(2)                                                                                        | 293(2)                                                                                          |
| λ (Mo–Kα), Å                               | 0.71073                                                                                       | 1.54178                                                                                       | 0.71073                                                                                         |
| Crystalsyst                                | Monoclinic                                                                                    | Monoclinic                                                                                    | Trigonal                                                                                        |
| Space group                                | <i>C</i> 2                                                                                    | <i>C</i> 2                                                                                    | <i>R</i> -3                                                                                     |
| <i>a</i> (Å)                               | 23.848(13)                                                                                    | 23.8508(6)                                                                                    | 14.4180(15)                                                                                     |
| <i>b</i> (Å)                               | 17.081(3)                                                                                     | 16.0961(3)                                                                                    | 14.4180(15)                                                                                     |
| <i>c</i> (Å)                               | 16.644(3)                                                                                     | 23.6646(4)                                                                                    | 21.872(4)                                                                                       |
| α(°)                                       | 90                                                                                            | 90                                                                                            | 90                                                                                              |
| β(°)                                       | 134.258(16)                                                                                   | 90.482(2)                                                                                     | 90                                                                                              |
| γ(°)                                       | 90                                                                                            | 90                                                                                            | 120                                                                                             |
| <i>V</i> (Å <sup>3</sup> )                 | 4856(3)                                                                                       | 9084.6(3)                                                                                     | 3937.6(9)                                                                                       |
| <i>Z</i>                                   | 2                                                                                             | 4                                                                                             | 3                                                                                               |
| <i>D<sub>c</sub></i> (g×cm <sup>-3</sup> ) | 1.319                                                                                         | 1.440                                                                                         | 1.537                                                                                           |
| μ (mm <sup>-1</sup> )                      | 0.614                                                                                         | 5.643                                                                                         | 1.183                                                                                           |
| F(000)                                     | 2000                                                                                          | 4080                                                                                          | 1872                                                                                            |
| GOF on F <sup>2</sup>                      | 0.888                                                                                         | 1.044                                                                                         | 1.068                                                                                           |
| R1 ( <i>I</i> > 2σ( <i>I</i> ))            | 0.0550                                                                                        | 0.0634                                                                                        | 0.0509                                                                                          |
| wR2( <i>I</i> > 2σ( <i>I</i> ))            | 0.1357                                                                                        | 0.1734                                                                                        | 0.1138                                                                                          |

$${}^a R_1 = \sum ||F_o| - |F_c|| / \sum |F_o|. \quad {}^b wR_2 = [\sum w(F_o^2 - F_c^2)^2 / \sum w(F_o^2)]^{1/2}.$$

**Table S2** Bond lengths and angles of **1-3**

| Polymer 1                 |                    |                           |                    |
|---------------------------|--------------------|---------------------------|--------------------|
| Fe(1)-N(20)               | 2.190(12)          | Fe(2)-N(6)#3              | 2.262(7)           |
| Fe(1)-N(9)#1              | 2.176(5)           | Fe(2)-N(6)#4              | 2.262(7)           |
| Fe(1)-N(9)                | 2.176(5)           | Fe(3)-N(21)               | 2.155(8)           |
| Fe(1)-N(10)#1             | 2.174(5)           | Fe(3)-N(21)#2             | 2.155(8)           |
| Fe(1)-N(10)               | 2.174(5)           | Fe(3)-N(3)#5              | 2.217(6)           |
| Fe(1)-O(1)                | 2.290(14)          | Fe(3)-N(3)#6              | 2.217(6)           |
| Fe(2)-N(15)               | 2.168(6)           | Fe(3)-N(18)#2             | 2.220(6)           |
| Fe(2)-N(15)#2             | 2.168(6)           | Fe(3)-N(18)               | 2.220(6)           |
| Fe(2)-N(19)               | 2.164(8)           |                           |                    |
| Fe(2)-N(19)#2             | 2.164(8)           |                           |                    |
| N(20)-Fe(1)-N(9)#1        | 87.10(18)          | N(15)#2-Fe(2)-N(6)#3      | 84.6(2)            |
| N(20)-Fe(1)-N(9)          | 87.10(18)          | N(19)-Fe(2)-N(6)#3        | 177.2(3)           |
| N(9)#1-Fe(1)-N(9)         | 174.2(4)           | N(19)#2-Fe(2)-N(6)#3      | 90.8(3)            |
| N(20)-Fe(1)-N(10)#1       | 87.17(17)          | N(15)-Fe(2)-N(6)#4        | 84.6(2)            |
| N(9)#1-Fe(1)-N(10)#1      | 88.5(2)            | N(15)#2-Fe(2)-N(6)#4      | 92.3(2)            |
| N(9)-Fe(1)-N(10)#1        | 91.2(2)            | N(19)-Fe(2)-N(6)#4        | 90.8(3)            |
| N(20)-Fe(1)-N(10)         | 87.17(17)          | N(19)#2-Fe(2)-N(6)#4      | 177.2(3)           |
| N(9)#1-Fe(1)-N(10)        | 91.2(2)            | N(6)#3-Fe(2)-N(6)#4       | 87.3(4)            |
| N(9)-Fe(1)-N(10)          | 88.5(2)            | N(21)-Fe(3)-N(21)#2       | 90.3(5)            |
| N(10)#1-Fe(1)-N(10)       | 174.3(3)           | N(21)-Fe(3)-N(3)#5        | 92.4(3)            |
| N(20)-Fe(1)-O(1)          | 180.0              | N(21)#2-Fe(3)-N(3)#5      | 90.9(2)            |
| N(9)#1-Fe(1)-O(1)         | 92.90(18)          | N(21)-Fe(3)-N(3)#6        | 90.9(2)            |
| N(9)-Fe(1)-O(1)           | 92.90(18)          | N(21)#2-Fe(3)-N(3)#6      | 92.4(3)            |
| N(10)#1-Fe(1)-O(1)        | 92.83(17)          | N(3)#5-Fe(3)-N(3)#6       | 175.2(4)           |
| N(10)-Fe(1)-O(1)          | 92.83(17)          | N(21)-Fe(3)-N(18)#2       | 176.9(3)           |
| N(15)-Fe(2)-N(15)#2       | 175.7(4)           | N(21)#2-Fe(3)-<br>N(18)#2 | 91.8(3)<br>85.3(2) |
| N(15)-Fe(2)-N(19)         | 89.7(3)            |                           |                    |
| N(15)#2-Fe(2)-N(19)       | 93.4(3)            | N(3)#5-Fe(3)-N(18)#2      | 91.2(2)            |
| N(15)-Fe(2)-N(19)#2       | 93.4(3)            | N(3)#6-Fe(3)-N(18)#2      | 91.8(3)            |
| N(15)#2-Fe(2)-<br>N(19)#2 | 89.7(3)<br>91.2(4) | N(21)-Fe(3)-N(18)         | 176.9(3)           |
| N(19)-Fe(2)-N(19)#2       | 92.2(2)            | N(21)#2-Fe(3)-N(18)       | 91.2(2)            |
| N(15)-Fe(2)-N(6)#3        | 132.1(5)           | N(3)#5-Fe(3)-N(18)        | 85.3(2)            |
| C(34)-N(9)-Fe(1)          | 122.4(5)           | N(3)#6-Fe(3)-N(18)        | 86.2(4)            |
| C(35)-N(9)-Fe(1)          | 131.6(5)           | N(18)#2-Fe(3)-N(18)       | 127.9(5)           |
| C(13)-N(10)-Fe(1)         | 123.9(5)           | C(17)-N(15)-Fe(2)         | 127.7(5)           |
| C(14)-N(10)-Fe(1)         | 131.1(5)           | C(18)-N(15)-Fe(2)         | 180.0              |
| C(16)-N(18)-Fe(3)         | 149.8(7)           | C(21)-N(20)-Fe(1)         | 148.0(7)           |
|                           |                    | C(20)-N(21)-Fe(3)         |                    |

---

**C(19)-N(19)-Fe(2)**

---

*Symmetry transformations used to generate equivalent atoms:*

#1  $-x+1, y, -z+2$     #2  $-x, y, -z+1$     #3  $x-1/2, y-1/2, z$   
#4  $-x+1/2, y-1/2, -z+1$     #5  $-x+1/2, y+1/2, -z+1$   
#6  $x-1/2, y+1/2, z$     #7  $x+1/2, y-1/2, z$   
#8  $x+1/2, y+1/2, z$

---

**Polymer 2**

---

|                      |            |                      |            |
|----------------------|------------|----------------------|------------|
| Fe(1)-N(15)          | 2.186(2)   | Fe(2)-N(19)#4        | 2.224(3)   |
| Fe(1)-N(15)#1        | 2.186(2)   | Fe(2)-N(19)          | 2.224(3)   |
| Fe(1)-N(3)#2         | 2.196(3)   | Fe(3)-N(11)#4        | 2.135(3)   |
| Fe(1)-N(3)#3         | 2.196(3)   | Fe(3)-N(11)          | 2.135(3)   |
| Fe(1)-N(9)#1         | 2.199(3)   | Fe(3)-N(8)#4         | 2.206(3)   |
| Fe(1)-N(9)           | 2.199(3)   | Fe(3)-N(8)           | 2.206(3)   |
| Fe(2)-N(16)          | 2.150(3)   | Fe(3)-N(12)          | 2.226(3)   |
| Fe(2)-N(16)#4        | 2.151(3)   | Fe(3)-N(12)#4        | 2.227(3)   |
| Fe(2)-N(4)#5         | 2.209(2)   |                      |            |
| Fe(2)-N(4)#6         | 2.209(2)   |                      |            |
|                      |            |                      |            |
| N(15)-Fe(1)-N(15)#1  | 180.0      | N(4)#5-Fe(2)-N(19)   | 85.20(10)  |
| N(15)-Fe(1)-N(3)#2   | 92.80(9)   | N(4)#6-Fe(2)-N(19)   | 91.58(9)   |
| N(15)#1-Fe(1)-N(3)#2 | 87.20(9)   | N(19)#4-Fe(2)-N(19)  | 90.72(14)  |
| N(15)-Fe(1)-N(3)#3   | 87.20(9)   | N(11)#4-Fe(3)-N(11)  | 90.78(16)  |
| N(15)#1-Fe(1)-N(3)#3 | 92.80(9)   | N(11)#4-Fe(3)-N(8)#4 | 89.41(11)  |
| N(3)#2-Fe(1)-N(3)#3  | 180.0(2)   | N(11)-Fe(3)-N(8)#4   | 178.97(11) |
| N(15)-Fe(1)-N(9)#1   | 88.36(10)  | N(11)#4-Fe(3)-N(8)   | 178.97(11) |
| N(15)#1-Fe(1)-N(9)#1 | 91.64(10)  | N(11)-Fe(3)-N(8)     | 89.41(11)  |
| N(3)#2-Fe(1)-N(9)#1  | 91.88(10)  | N(8)#4-Fe(3)-N(8)    | 90.42(15)  |
| N(3)#3-Fe(1)-N(9)#1  | 88.12(10)  | N(11)#4-Fe(3)-N(12)  | 94.07(10)  |
| N(15)-Fe(1)-N(9)     | 91.64(10)  | N(11)-Fe(3)-N(12)    | 90.34(10)  |
| N(15)#1-Fe(1)-N(9)   | 88.36(10)  | N(8)#4-Fe(3)-N(12)   | 90.65(9)   |
| N(3)#2-Fe(1)-N(9)    | 88.12(10)  | N(8)-Fe(3)-N(12)     | 84.91(10)  |
| N(3)#3-Fe(1)-N(9)    | 91.88(10)  | N(11)#4-Fe(3)-       | 90.34(10)  |
| N(9)#1-Fe(1)-N(9)    | 180.0      | N(12)#4              | 94.08(10)  |
| N(16)-Fe(2)-N(16)#4  | 89.68(16)  | N(11)-Fe(3)-N(12)#4  | 84.91(10)  |
| N(16)-Fe(2)-N(4)#5   | 92.98(10)  | N(8)#4-Fe(3)-        | 90.66(9)   |
| N(16)#4-Fe(2)-N(4)#5 | 90.27(10)  | N(12)#4              | 173.72(13) |
| N(16)-Fe(2)-N(4)#6   | 90.27(10)  | N(8)-Fe(3)-N(12)#4   | 130.3(2)   |
| N(16)#4-Fe(2)-N(4)#6 | 92.98(10)  | N(12)-Fe(3)-N(12)#4  | 126.7(2)   |
| N(4)#5-Fe(2)-N(4)#6  | 175.42(13) | C(2)-N(3)-Fe(1)#7    | 128.3(2)   |
| N(16)-Fe(2)-N(19)#4  | 89.83(11)  | C(1)-N(3)-Fe(1)#7    | 127.8(2)   |
| N(16)#4-Fe(2)-       | 178.11(10) | C(15)-N(4)-Fe(2)#8   | 124.4(2)   |
| N(19)#4              | 91.58(9)   | C(16)-N(4)-Fe(2)#8   | 131.5(2)   |

---

|                      |            |                   |          |
|----------------------|------------|-------------------|----------|
| N(4)#5-Fe(2)-N(19)#4 | 85.20(10)  | C(17)-N(8)-Fe(3)  | 145.5(3) |
| N(4)#6-Fe(2)-N(19)#4 | 178.11(10) | C(12)-N(8)-Fe(3)  | 149.4(3) |
| N(16)-Fe(2)-N(19)    | 89.83(11)  | C(23)-N(9)-Fe(1)  | 129.3(2) |
| N(16)#4-Fe(2)-N(19)  | 150.2(3)   | C(19)-N(11)-Fe(3) | 127.9(2) |
| C(38)-N(16)-Fe(2)    | 123.8(2)   | C(21)-N(12)-Fe(3) | 128.6(2) |
| C(35)-N(19)-Fe(2)    | 132.1(2)   | C(25)-N(15)-Fe(1) |          |
| C(36)-N(19)-Fe(2)    |            | C(24)-N(15)-Fe(1) |          |

*Symmetry transformations used to generate equivalent atoms:*

#1  $-x+1/2, -y+1/2, -z$     #2  $-x+1, -y+1, -z$   
 #3  $x-1/2, y-1/2, z$     #4  $-x+1, y, -z+1/2$   
 #5  $-x+1, y-1, -z+1/2$     #6  $x, y-1, z$     #7  $x+1/2, y+1/2, z$   
 #8  $x, y+1, z$

### Polymer 3

|                     |          |                      |           |
|---------------------|----------|----------------------|-----------|
| Fe(1)-O(1)#1        | 2.128(2) | Fe(1)-N(1)#1         | 2.170(2)  |
| Fe(1)-O(1)          | 2.128(2) | Fe(1)-Cl(1)          | 2.5148(8) |
| Fe(1)-N(1)          | 2.170(2) | Fe(1)-Cl(1)#1        | 2.5148(9) |
| O(1)#1-Fe(1)-O(1)   | 180.0    | N(1)-Fe(1)-Cl(1)     | 89.74(7)  |
| O(1)#1-Fe(1)-N(1)   | 85.77(9) | N(1)#1-Fe(1)-Cl(1)   | 90.26(7)  |
| O(1)-Fe(1)-N(1)     | 94.23(9) | O(1)#1-Fe(1)-Cl(1)#1 | 90.73(7)  |
| O(1)#1-Fe(1)-N(1)#1 | 94.23(9) | O(1)-Fe(1)-Cl(1)#1   | 89.26(7)  |
| O(1)-Fe(1)-N(1)#1   | 85.77(9) | N(1)-Fe(1)-Cl(1)#1   | 90.26(7)  |
| N(1)-Fe(1)-N(1)#1   | 180.0    | N(1)#1-Fe(1)-Cl(1)#1 | 89.74(7)  |
| O(1)#1-Fe(1)-Cl(1)  | 89.27(7) | Cl(1)-Fe(1)-Cl(1)#1  | 180.0     |
| O(1)-Fe(1)-Cl(1)    | 90.74(7) | Fe(1)-O(1)-H(1A)     | 110.0     |
| C(7)-N(1)-Fe(1)     | 129.8(2) | Fe(1)-O(1)-H(1B)     | 126.3     |
| C(10)-N(1)-Fe(1)    | 125.8(2) |                      |           |

*Symmetry transformations used to generate equivalent atoms:*

#1  $-x+4/3, -y+5/3, -z+2/3$     #2  $-x+y+1, -x+2, z$   
 #3  $-y+2, x-y+1, z$

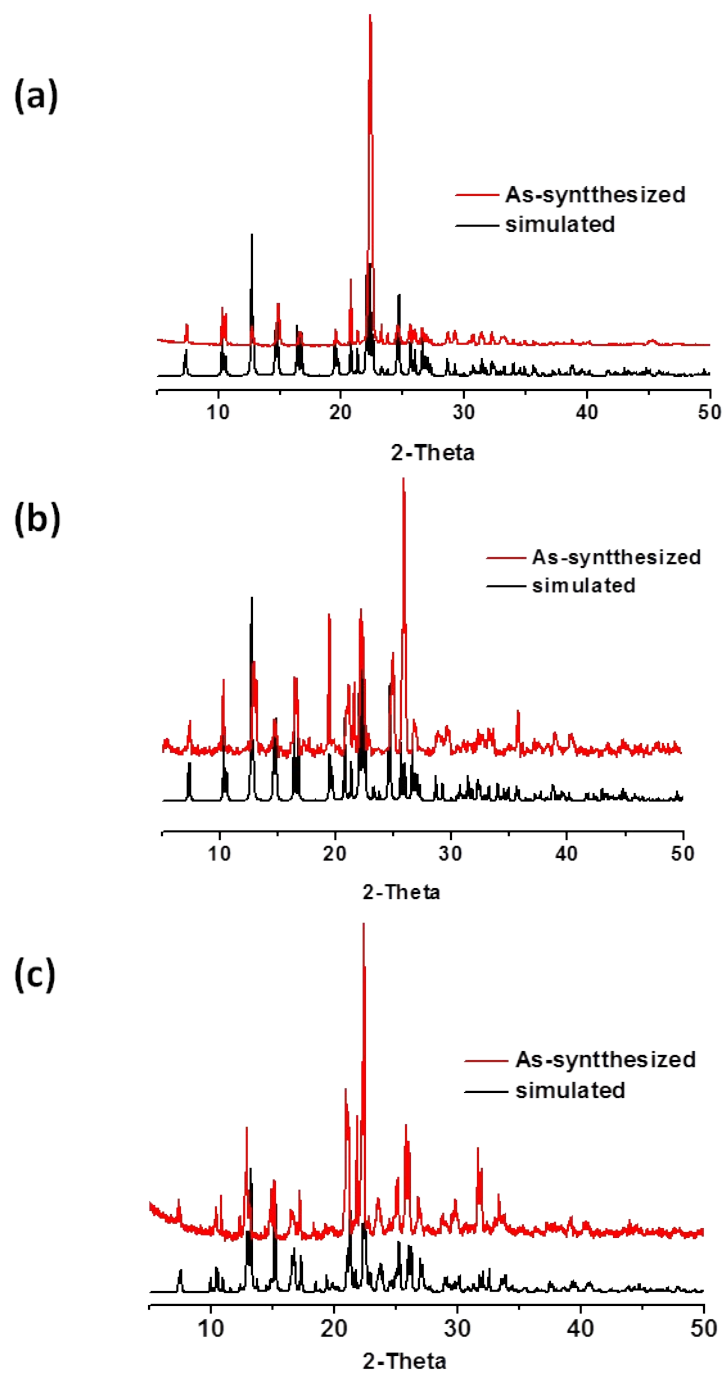

**Fig S1.** Experimental (red) and simulated (black) PXRD patterns of Polymer 1-3 (a-c)

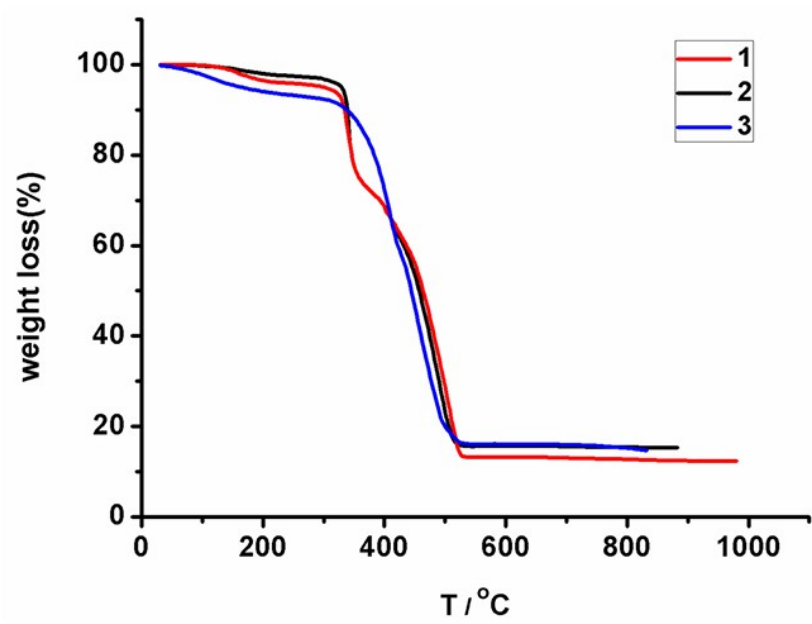

**Fig S2.** Thermogravimetric curve of Polymer 1-3.

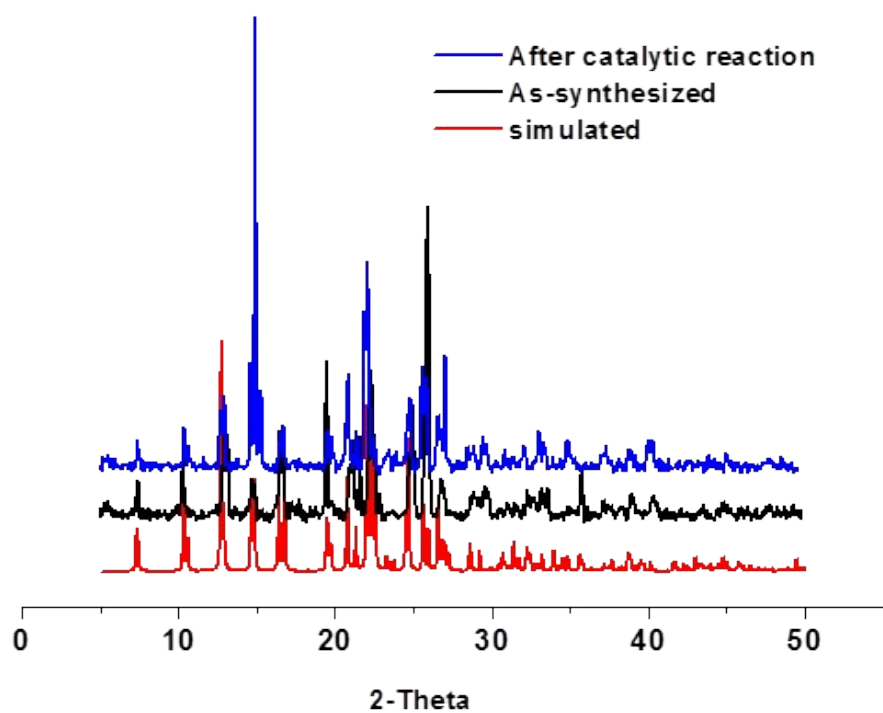

**Fig S3.** The PXRD diagram before and after the catalyst reaction for **1**



**Table S3.** <sup>1</sup>H NMR data of biphenyl compound **5a-5c**

| Compounds                             | <sup>1</sup> H NMR (400 MHz, CDCl <sub>3</sub> )                                                                                                                                                                                                                |
|---------------------------------------|-----------------------------------------------------------------------------------------------------------------------------------------------------------------------------------------------------------------------------------------------------------------|
| Diphenyl I ( <b>5a</b> )              | δ 7.44-7.58 (m, 6H, CHar), 7.78 (d, 4H, J = 8.1 Hz, CHar).                                                                                                                                                                                                      |
| 4, 4'-Dimethoxybiphenyl ( <b>5b</b> ) | δ 3.81 (s, 6H, OCH <sub>3</sub> ), 6.88 (d, 4H, J = 8.5 Hz, CHar), 7.71 (d, 4H, J = 8.5 Hz, CHar).<br>δ 1.37 (t, 6H, J = 7.0 Hz, CH <sub>3</sub> ), 4.03 (q, 4H, J = 7.0 Hz, CH <sub>2</sub> ), 6.86 (d, 4H, J = 8.5 Hz, CHar), 7.69 (d, 4H, J = 8.5 Hz, CHar). |
